# Supplementary material
Source: PubMed Central journal article supplement (PMC4907173)
Supplement: AEM.00730-16_zam999117244so1.pdf [file AEM.00730-16_zam999117244so1.pdf]

**Supplementary Information to: “Influence of niche-specific nutrients on secondary metabolism in Vibrionaceae”.**

Sonia Giubergia, Christopher Phippen, Charlotte H. Gotfredsen, Kristian Fog Nielsen and Lone Gram

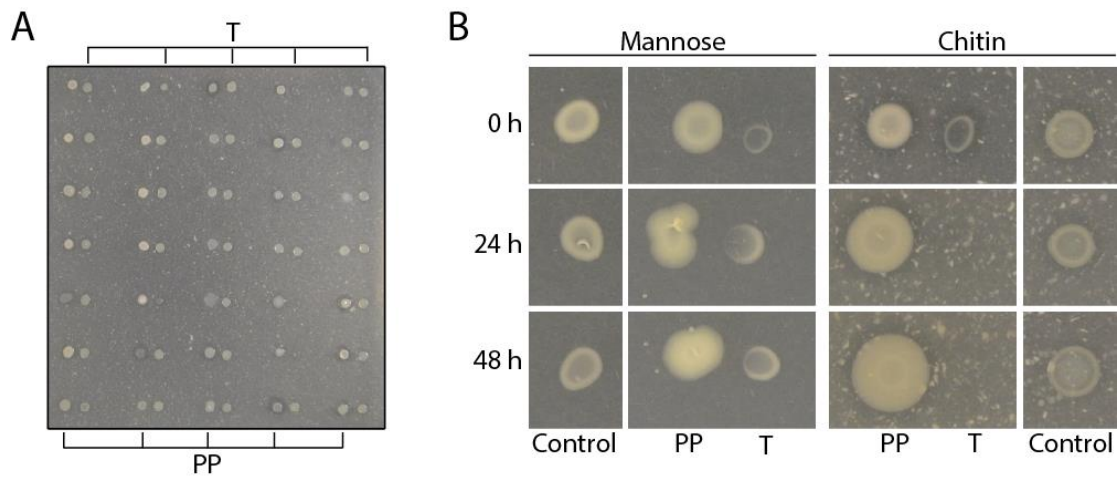

**Figure S1.** (A) Example of a plate prepared spotting the potential producers (PP) and the target strain *V. anguillarum* (T) on chitin medium. Clear haloes surrounding the colonies indicate chitinolytic activity. (B) Detailed behavior of *V. furnissii* S0821 over time and on the two media. “Control” is the target strain spotted alone on the same two media.

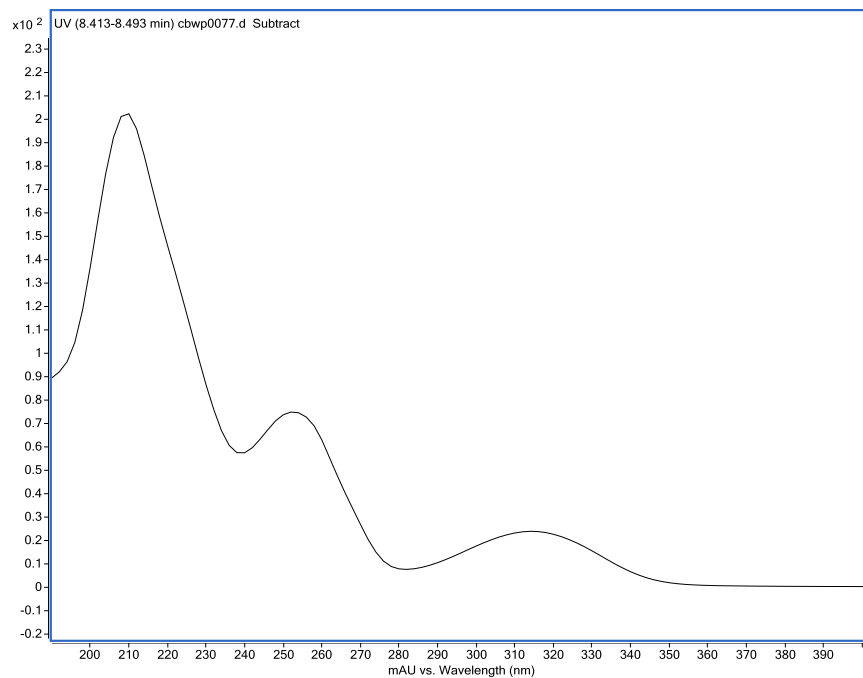

**Figure S2** UV/Vis spectra of fluvibactin.

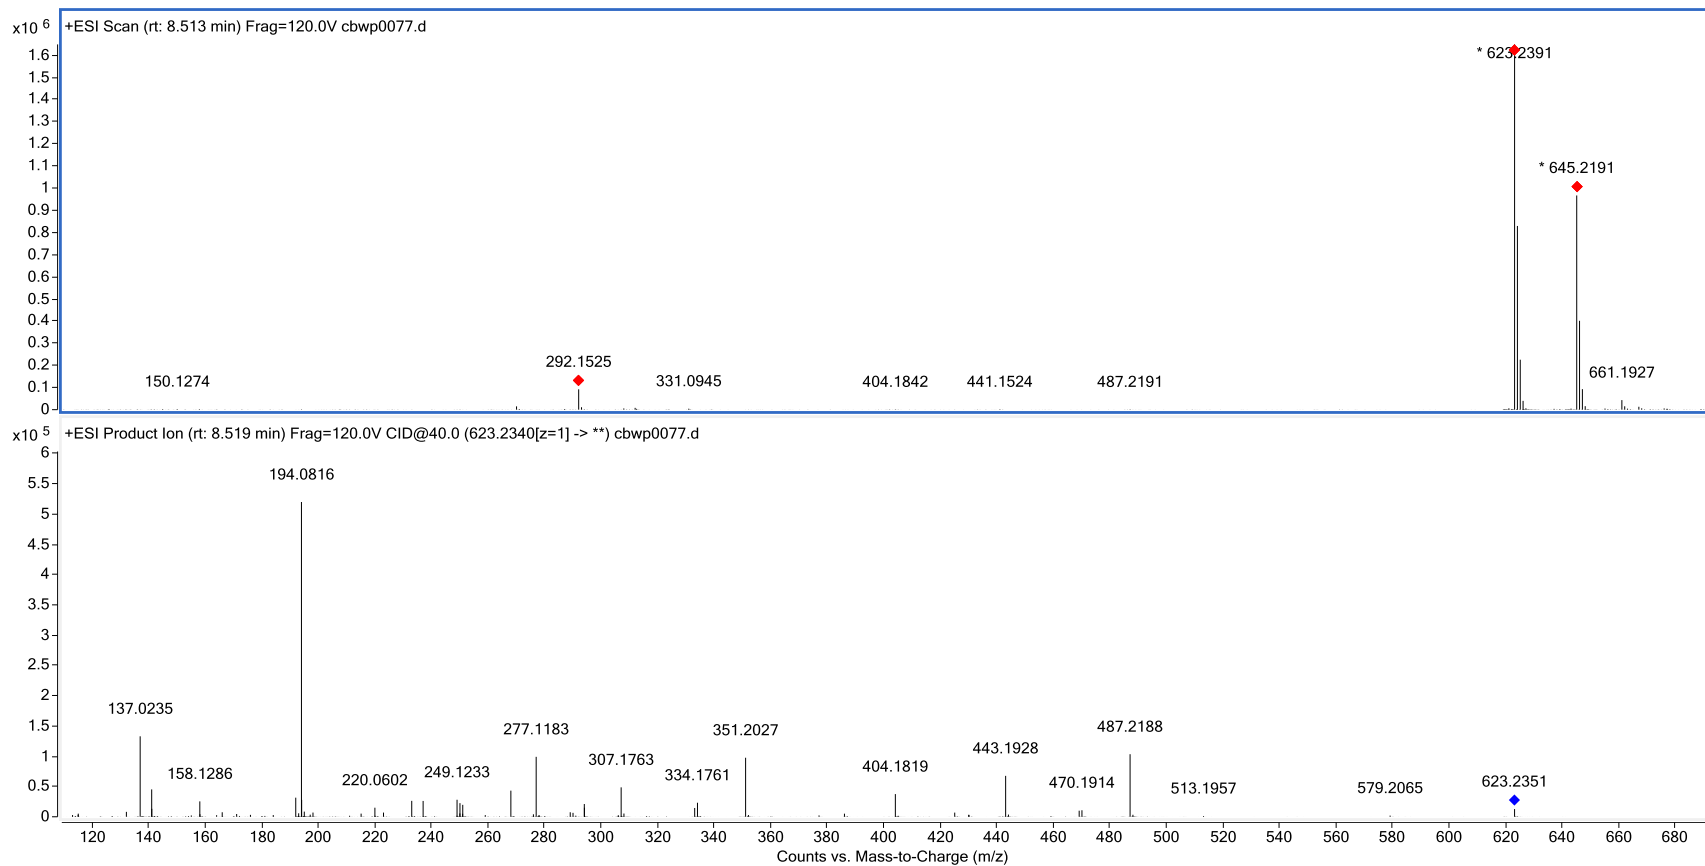

**Figure S3 MS and MS/MS spectra of fluvibactin**

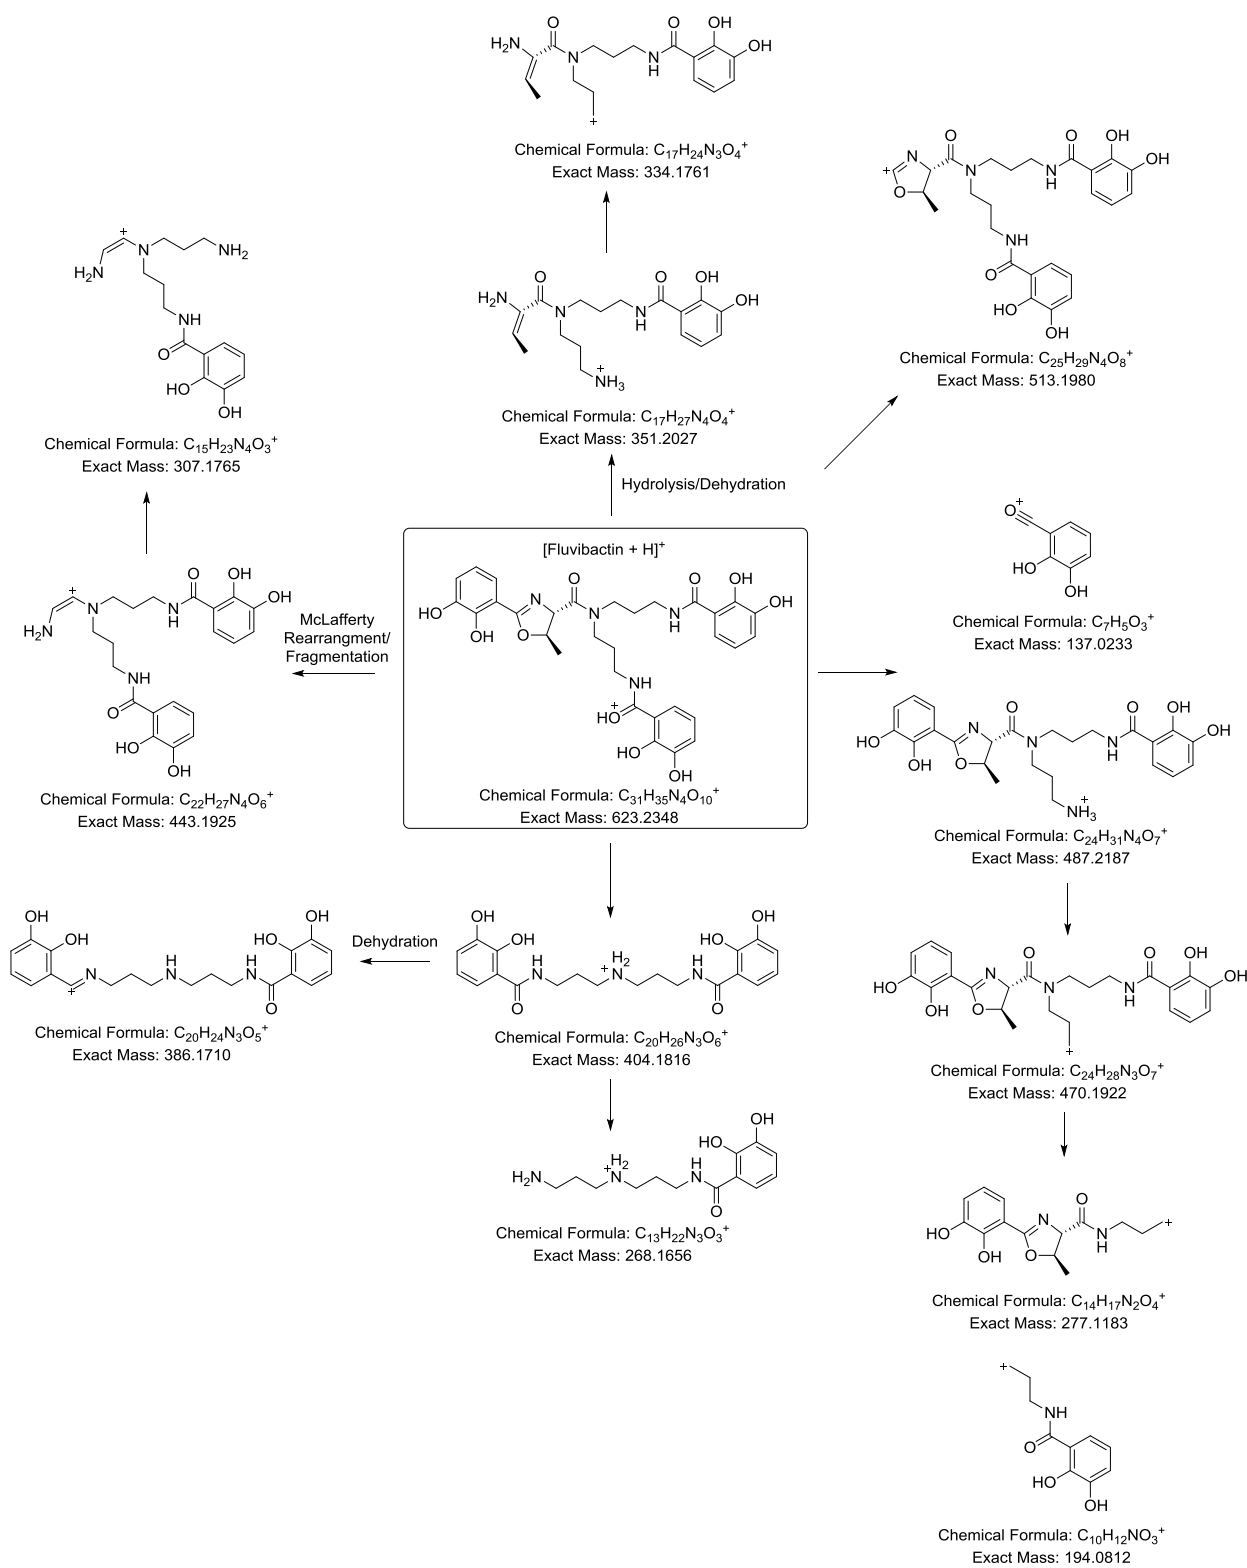

**Figure S4** Proposed fragments of fluivibactin

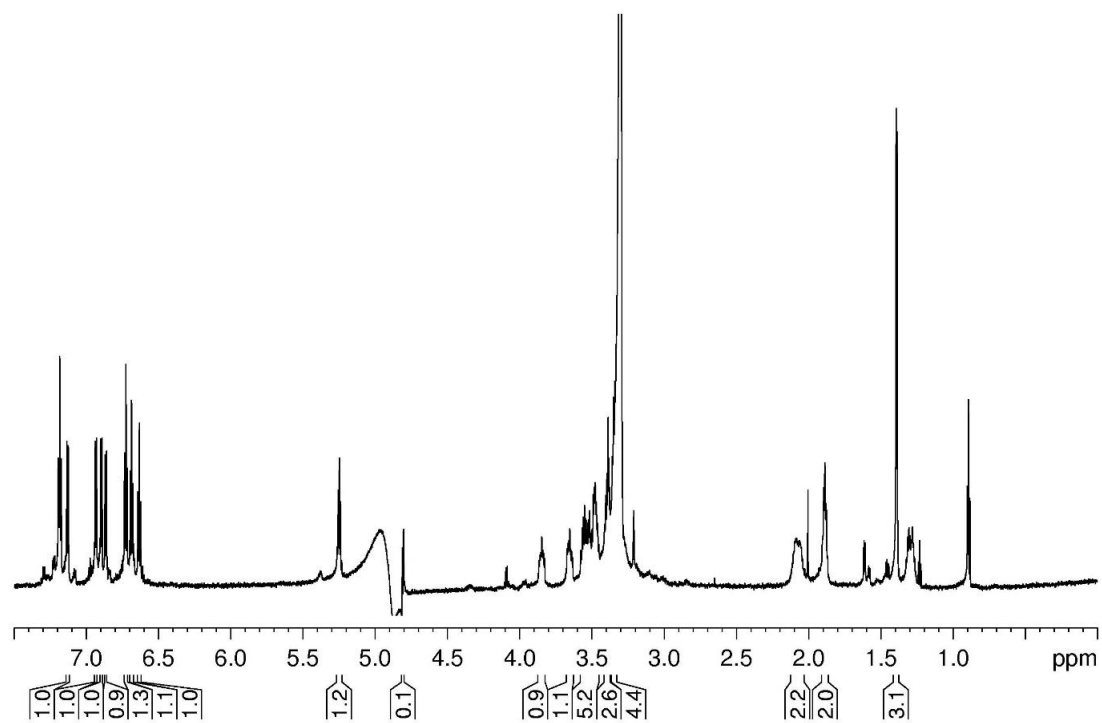

**Figure S5** 1D <sup>1</sup>H NMR spectrum of fluvibactin at 800 MHz.

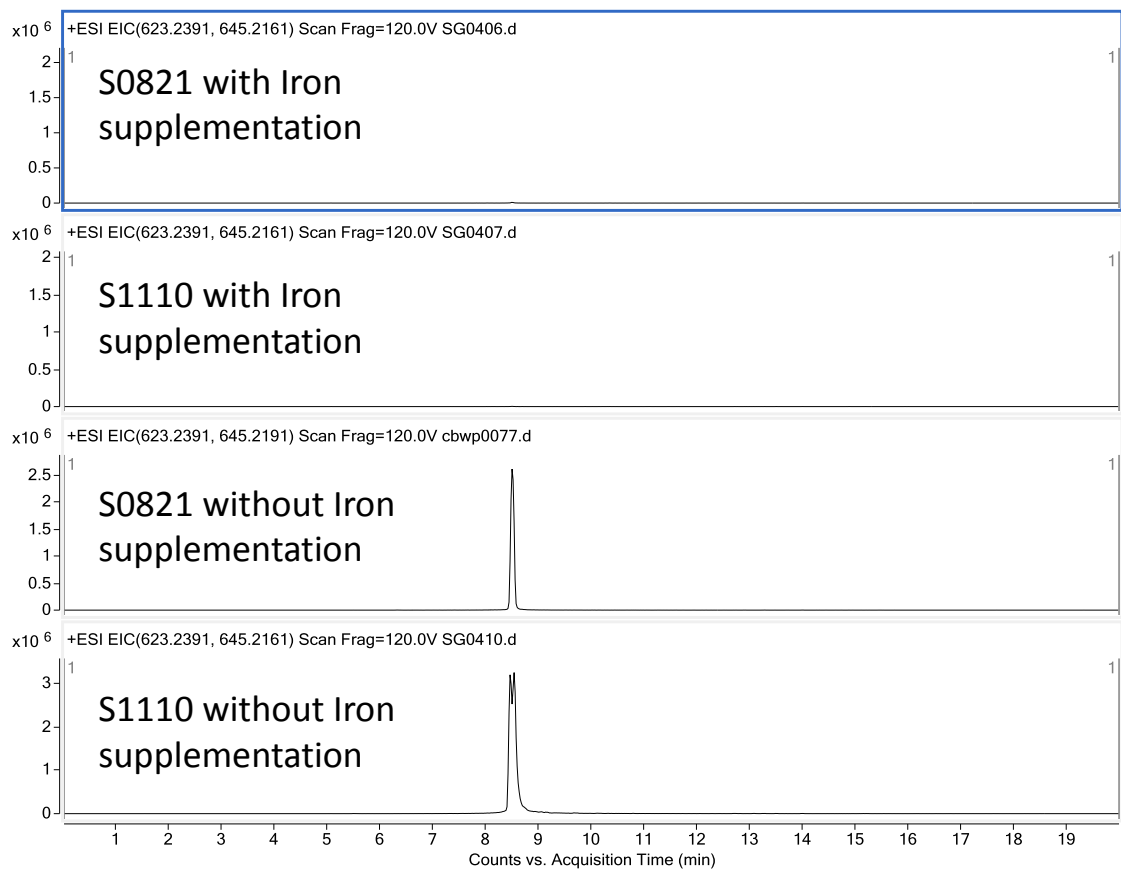

**Figure S6** EIC of fluvibactin for S0821 and S1110 grown with and without iron supplementation

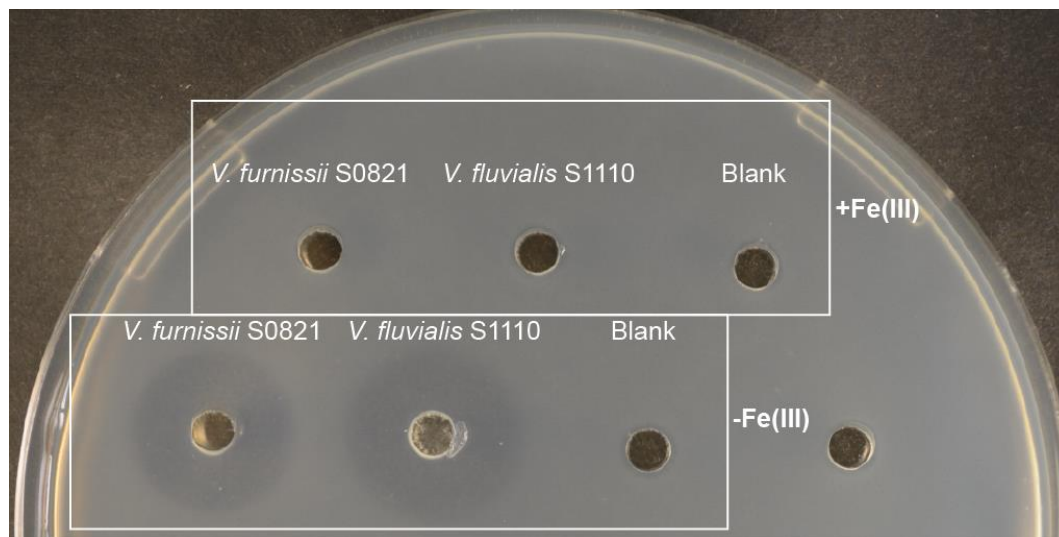

**Figure S7** Test of the antibacterial activity of ethyl acetate extracts obtained from cultures of *V. furnissii* S0821 and *V. fluvialis* S1162 grown in presence (top panel) and in absence (lower panel) of Fe(III).

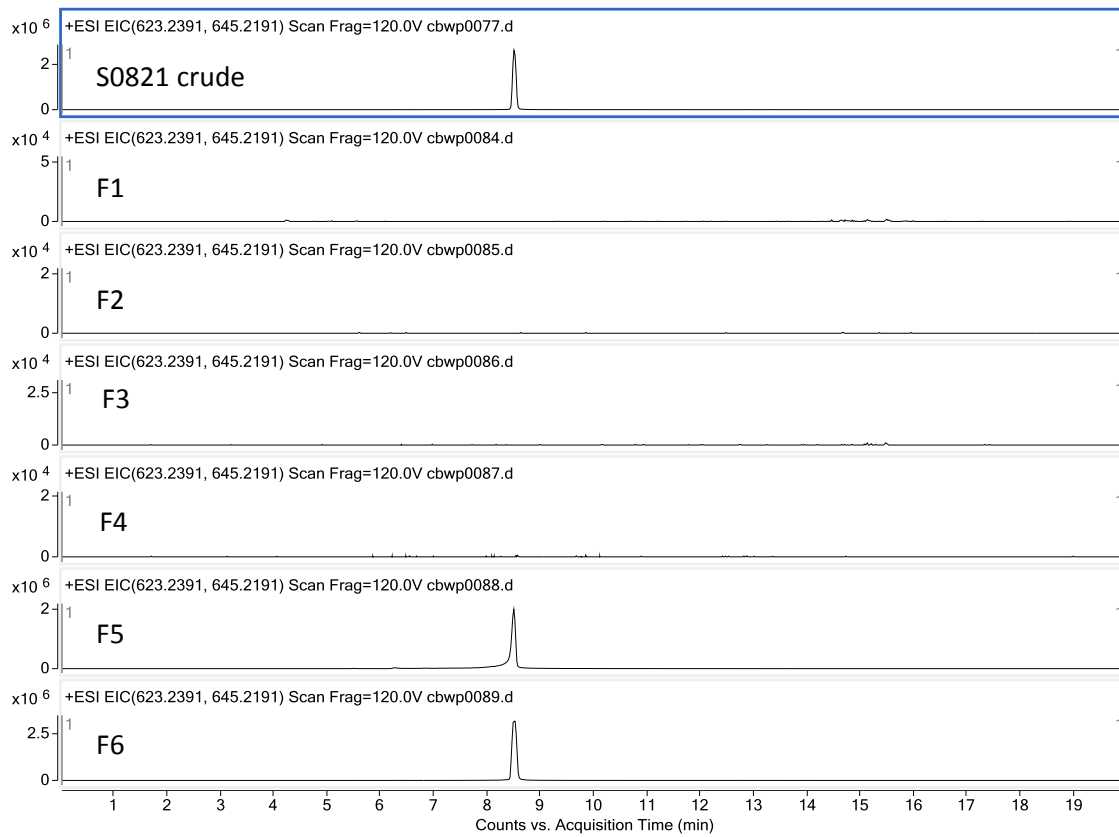

**Figure S8** EIC of fluvibactin in SPE fractions of S0821 culture



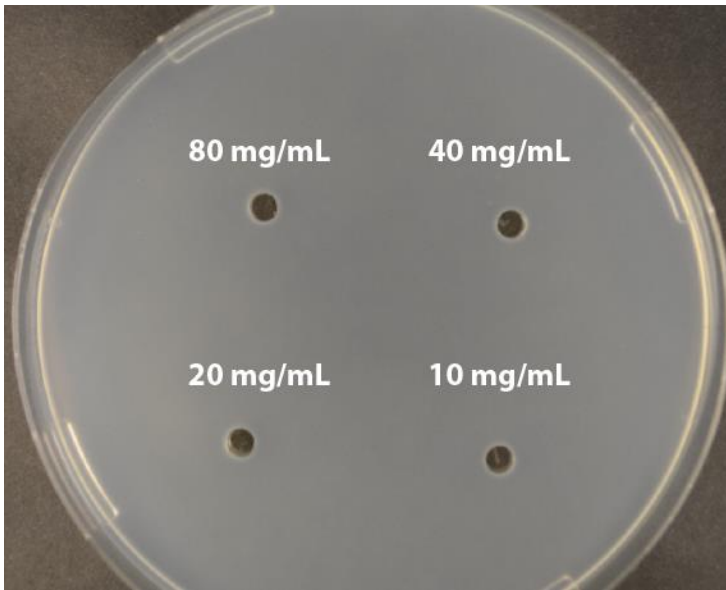

**Figure SI 9** Assessment of antibacterial activity of ectoine (Fluka 81619, dissolved in sterile milliQ water). 50  $\mu$ L of 10, 20, 40, 80 mg/mL solutions were transferred to wells punched in solid medium seeded with *V. anguillarum* 90-11-287. No growth inhibition of the pathogen was observed after 48 hours of incubation of the plate at 25 °C.

**Table S1** Amino acid sequences of the putative bacteriocins predicted by Bagel3 based on the analysis of the genomic sequences of *V. furnissii* S0821 and *V. fluvialis* S1110.

| Species             | Strain | Pfam          | Predicted amino acid sequence                                                                                                                                                                                                                                                                                                                                                        |
|---------------------|--------|---------------|--------------------------------------------------------------------------------------------------------------------------------------------------------------------------------------------------------------------------------------------------------------------------------------------------------------------------------------------------------------------------------------|
| <i>V. furnissii</i> | S0821  | Peptidase_M23 | FNQLGFSYQELMKIMETDLNYLALDTLKPGNVLRFWRSQDGRSLAKMELK<br>FSLVERAVYVRTDDGSFEFKDVKIPGTWKEYPLIGEIQGSFSQSANQLGLGS<br>SDIDQIVTLKDKINFVRDVRAGDRFEVLSRQFVGDQLTGNSEIQAIKIFSR<br>SNDVTAYLYKDGQYYDKNGESLQRAFQRYPTTGKWRLSSGFDPNRRHPVT<br>GRIAPHNGTDFAAPGTGPVVSTGDGVVVMTRNHPYAGNYVVIQHGSTYM<br>TRYLHLSKILVSKGQKVSQRIGLSGATGRVTGPHIHYELIVRGRPVDAMK<br>ANIPMANSVPPKDMANFTARRNELDRMLAHQEGLLASTNSQATPES |
| <i>V. fluvialis</i> | S1110  | Peptidase_M23 | TDLNYLALDTLKPGNILRFWRGQDGHSLAKMELEFSLVERAVYARTDDGSFE<br>FKDVKIPGKWKEYPLIGEIQGSFSQSANQLGLGSSDIDQIVSLKDKINFVR<br>DIRAGDRFEVLSRQFVGEKMTGNSEIQAIKIFSRNEVTAYLYKDGQYYDK<br>NGESLQRAFQRYPTTQKWRMSSGFDPNRHHPVTGRIAPHNGTDFAAPIG<br>TPVVSTGDGVVVMTRNHPYAGNYVVIQHGSTYMTRYLHLSKILVRKGQKV<br>SRGQRIGLSGATGRVTGPHIHYELIVRGRPVDAMKANIPMANSVPPKEMA<br>SFVSRRNELDKMLAHQESLLASNSSPDNPES                |

**Table S2** MS/MS fragments of Fluvibactin

| <b>Observed Mass</b> | <b>Predicted Formula</b>                                          | <b>Assignment</b>   | <b>Predicted Mass</b> | <b>Error (ppm)</b> |
|----------------------|-------------------------------------------------------------------|---------------------|-----------------------|--------------------|
| 645.2158             | C <sub>31</sub> H <sub>34</sub> N <sub>4</sub> O <sub>10</sub> Na | [M+Na] <sup>+</sup> | 645.2167              | -1.394880201       |
| 623.2342             | C <sub>31</sub> H <sub>35</sub> N <sub>4</sub> O <sub>10</sub>    | [M+H] <sup>+</sup>  | 623.2348              | -0.962719027       |
| 513.1963             | C <sub>25</sub> H <sub>29</sub> N <sub>4</sub> O <sub>8</sub>     | See figure S4       | 513.198               | -3.312561623       |
| 487.2186             | C <sub>24</sub> H <sub>31</sub> N <sub>4</sub> O <sub>7</sub>     | See figure S4       | 487.2187              | -0.205246638       |
| 470.1918             | C <sub>24</sub> H <sub>28</sub> N <sub>3</sub> O <sub>7</sub>     | See figure S4       | 470.1922              | -0.850715941       |
| 443.192              | C <sub>22</sub> H <sub>27</sub> N <sub>4</sub> O <sub>6</sub>     | See figure S4       | 443.1925              | -1.128177936       |
| 404.1813             | C <sub>20</sub> H <sub>26</sub> N <sub>3</sub> O <sub>6</sub>     | See figure S4       | 404.1816              | -0.742240617       |
| 386.1708             | C <sub>20</sub> H <sub>24</sub> N <sub>3</sub> O <sub>5</sub>     | See figure S4       | 386.171               | -0.51790528        |
| 351.2023             | C <sub>17</sub> H <sub>27</sub> N <sub>4</sub> O <sub>4</sub>     | See figure S4       | 351.2027              | -1.138943408       |
| 334.1758             | C <sub>17</sub> H <sub>24</sub> N <sub>3</sub> O <sub>4</sub>     | See figure S4       | 334.1761              | -0.897730269       |
| 307.176              | C <sub>15</sub> H <sub>23</sub> N <sub>4</sub> O <sub>3</sub>     | See figure S4       | 307.1765              | -1.627728684       |
| 277.1182             | C <sub>14</sub> H <sub>17</sub> N <sub>2</sub> O <sub>4</sub>     | See figure S4       | 277.1183              | -0.360856717       |
| 268.1656             | C <sub>13</sub> H <sub>22</sub> N <sub>3</sub> O <sub>3</sub>     | See figure S4       | 268.1656              | 0                  |
| 194.0812             | C <sub>10</sub> H <sub>12</sub> N <sub>3</sub> O                  | See figure S4       | 194.0812              | 0                  |
| 137.0234             | C <sub>7</sub> H <sub>5</sub> O <sub>3</sub>                      | See figure S4       | 137.0233              | 0.729802888        |

**Table SI3** NMR assignment for Fluvibactin in CD<sub>3</sub>OD

| Atom assignment | <sup>13</sup> C chemical shift [ppm] | <sup>1</sup> H chemical shift [ppm], Integral,multiplicity, <i>J</i> [Hz] |
|-----------------|--------------------------------------|---------------------------------------------------------------------------|
| 1               | 150.2                                | -                                                                         |
| 2               | 147.3                                | -                                                                         |
| 3               | 119.7*                               | 6.90, 1H, dd, 7.8, 1                                                      |
| 4               | 119.6*                               | 6.69, 1H, t, 8                                                            |
| 5               | 118.6#                               | 7.18, 1H, br. d, 8                                                        |
| 6               | 116.7                                | -                                                                         |
| 7               | 171.5                                | -                                                                         |
| 9a              | 37.8 <sup>α</sup>                    | 3.39, 1H, m                                                               |
| 9b              | 37.8 <sup>α</sup>                    | 3.35, 1H, m                                                               |
| 10              | 28.4                                 | 1.89, 2H, p, 7                                                            |
| 11a             | 45                                   | 3.56, 1H, m                                                               |
| 11b             | 45                                   | 3.49, 1H, m                                                               |
| 13a             | 46.7                                 | 3.84, 1H, m                                                               |
| 13b             | 46.7                                 | 3.65, 1H, m                                                               |
| 14a             | 30.3                                 | 2.09, 1H, m                                                               |
| 14b             | 30.3                                 | 2.05, 1H, m                                                               |
| 15a             | 37.9 <sup>α</sup>                    | 3.52, 1H, m                                                               |
| 15b             | 37.9 <sup>α</sup>                    | 3.47, 1H, m                                                               |
| 17              | 171.8                                | -                                                                         |
| 18              | 116.7                                | -                                                                         |
| 19              | 150.2                                | -                                                                         |
| 20              | 147.3                                | -                                                                         |
| 21              | 119.6*                               | 6.86, 1H, dd, 7.8,1                                                       |
| 22              | 119.6*                               | 6.63, 1H, t, 8                                                            |
| 23              | 118.6#                               | 7.19, 1H, br. d, 8                                                        |
| 24              | 171.4                                | -                                                                         |
| 25              | 73                                   | 4.81, 1H, d, 6.4                                                          |
| 26              | 79.8                                 | 5.25, 1H, p, 6.4                                                          |
| 27              | 20.2                                 | 1.39, 3H, d, 6.4                                                          |
| 28              | 167.8                                | -                                                                         |
| 30              | 111.8                                | -                                                                         |
| 31              | 149.4                                | -                                                                         |
| 32              | 146.7                                | -                                                                         |
| 33              | 120.2                                | 6.93, 1H, dd, 8,1.4                                                       |
| 34              | 119.9 <sup>^</sup>                   | 6.72, 1H, t, 8                                                            |
| 35              | 119.9 <sup>^</sup>                   | 7.13, 1H, dd, 8,1.4                                                       |

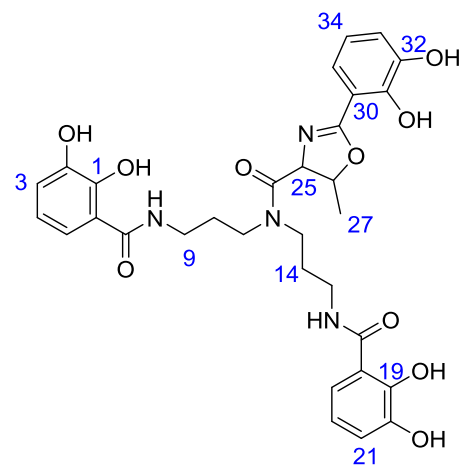

<sup>^</sup>,\*,<sup>α</sup>,# : indicates overlap and thereby specific assignment impossible.

All spectra were acquired on a Bruker Advance 800 MHz NMR spectrometer using standard pulse sequenced. Chemical shifts are reported in ppm relative to deuterated solvent peaks as internal standards ( $\delta\text{H}$ ,  $\text{CD}_3\text{OD}$  3.30 ppm;  $\delta\text{C}$ ,  $\text{CD}_3\text{OD}$  49 ppm). Coupling constants ( $J$ ) are given in hertz (Hz). Multiplicities of  $^1\text{H}$  NMR signals are reported as follows: d, doublet; br.d, broad doublet; t, triplet; p, pentet; m, multiplet.
